# Supplementary material
Source: PubMed Central journal article supplement (PMC2689804)
Supplement: en.2008-1039_5.pdf [file en.2008-1039_5.pdf]

**Supplemental Table 1. Oligodeoxynucleotide sequences used for quantitative RT-PCR.**

| Name                                                    | Species | Direction | Sequence (5' to 3')                         |
|---------------------------------------------------------|---------|-----------|---------------------------------------------|
| <u>Light Upon Extension Quantitative RT-PCR primers</u> |         |           |                                             |
| β-actin                                                 | Human   | Forward   | CACGCCACCTTCTACAATGAGCTGCGG <sup>#</sup>    |
|                                                         |         | Reverse   | GGTCATCTTCTCGCGGTTGG                        |
| SREBP-1                                                 | Human   | Forward   | GACGGCCTCTGGAACCTCATCCGTC <sup>§</sup>      |
|                                                         |         | Reverse   | TAGCATCCACTCGCAGAGCA                        |
| ACC                                                     | Human   | Forward   | CACATGCTCCAAACCAGGCCATGTG <sup>§</sup>      |
|                                                         |         | Reverse   | GCCAGTCCACACGAAGACCA                        |
| FAS                                                     | Human   | Forward   | CACCTTAACCTGGTAGTGAGTGGGAAGGTG <sup>§</sup> |
|                                                         |         | Reverse   | CTTCCGGGTGGTCAAGA                           |
| <u>SYBR Green Quantitative RT-PCR primers</u>           |         |           |                                             |
| Cyclophilin                                             | Rat     | Forward   | CTTCTTGCTGGTCTTGCCATTCTT                    |
|                                                         |         | Reverse   | TGGATGGCAAGCATGTGGTCTTTG                    |
| SREBP-1                                                 | Rat     | Forward   | GATTGCACATTTGAAGACATGCTT                    |
|                                                         |         | Reverse   | GGTCCCAGGAAGGCTTCCAGAGA                     |
| ACC $\alpha$                                            | Rat     | Forward   | CGATGTTCTGTTGGACAACGCCTT                    |
|                                                         |         | Reverse   | TCTCTGATCCACCTCACAGTTGAC                    |
| FAS                                                     | Rat     | Forward   | GTGCACCCCATTTGAAGGTTCC                      |
|                                                         |         | Reverse   | GGTTTGGAAATGCTGTCCAGGG                      |
| SCD1                                                    | Rat     | Forward   | ACATTCAATCTCGGGAGAACA                       |
|                                                         |         | Reverse   | CCATGCAGTCGATGAAGAAC                        |
| SCD2                                                    | Rat     | Forward   | ATGCCGGCTCACATACTG                          |
|                                                         |         | Reverse   | GACCAGTGTGATCCCGTACA                        |
| ABCA1                                                   | Rat     | Forward   | AGCAGTTTGTGGCCCTCTTGT                       |
|                                                         |         | Reverse   | TGAAGTTCCAGGTTGGGGTACTTG                    |
| ABCG1                                                   | Rat     | Forward   | ATGGAAGGTTGCCACAGCTTCTC                     |
|                                                         |         | Reverse   | AGTCATGGTCTTGGCCAGGTAGT                     |
| CPT-1 $\alpha$                                          | Rat     | Forward   | AGACCGTGAGGAACTCAAACCCAT                    |
|                                                         |         | Reverse   | CACAACAATGTGCCTGCTGTCCTT                    |
| CPT-2                                                   | Rat     | Forward   | TCCTGCATACCAGCAGATGAACCA                    |
|                                                         |         | Reverse   | ACAGTGGAGAACTCTCGGGCATT                     |
| VLCAD                                                   | Rat     | Forward   | GTGGGAATGTTCAAAGGCCAGCTT                    |
|                                                         |         | Reverse   | AAGGAGTCATTCTTGGCAGGGTCA                    |
| LCAD                                                    | Rat     | Forward   | AATGGGAGAAAGCCGGAGAAGTGA                    |
|                                                         |         | Reverse   | GAAACCAGGGCCTGTGCAATTTGA                    |
| RPL32                                                   | Rat     | Forward   | AAACTGGCGGAAACCCAGAG                        |
|                                                         |         | Reverse   | GCAATCTCAGCACAGTAAGATT                      |

<sup>#</sup> 6-carboxy-4',5'-dichloro-2',7'-dimethoxy-fluorescein-labeled β-actin primer used as internal control for all real-time RT-PCR reactions.

**§6-carboxy-fluorescein-labeled forward PCR primers used for real-time RT-PCR reactions.**
