# Supplementary material
Source: PubMed Central journal article supplement (PMC2689804)

Suppl Figure 1

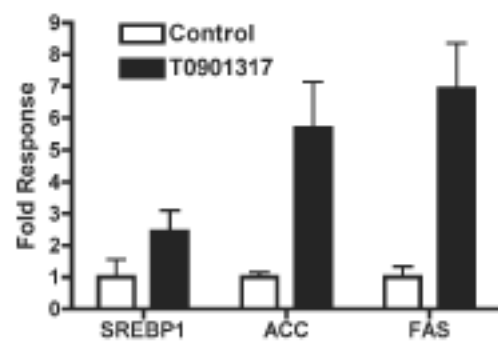

Supplement: en.2008-1039_1.pdf [file en.2008-1039_1.pdf]

Suppl Figure 2

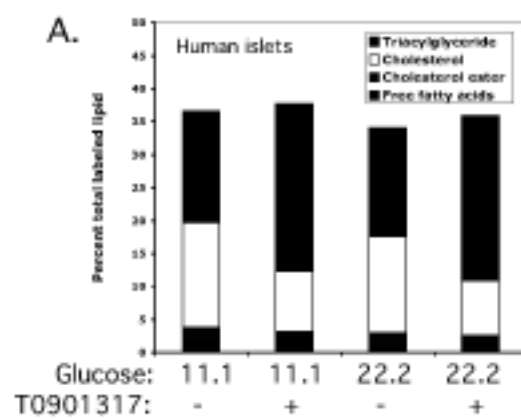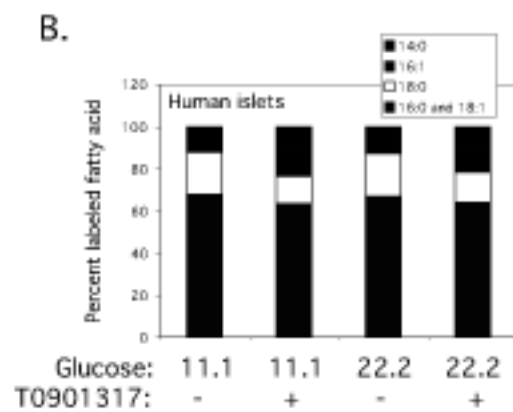

Supplement: en.2008-1039_2.pdf [file en.2008-1039_2.pdf]

Suppl Figure 3

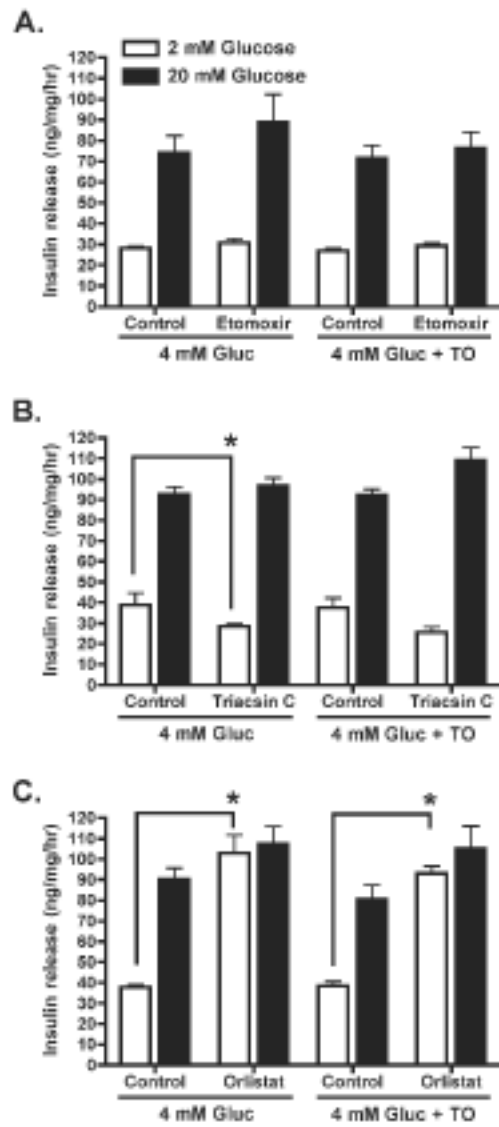

Supplement: en.2008-1039_3.pdf [file en.2008-1039_3.pdf]

Suppl Figure 4

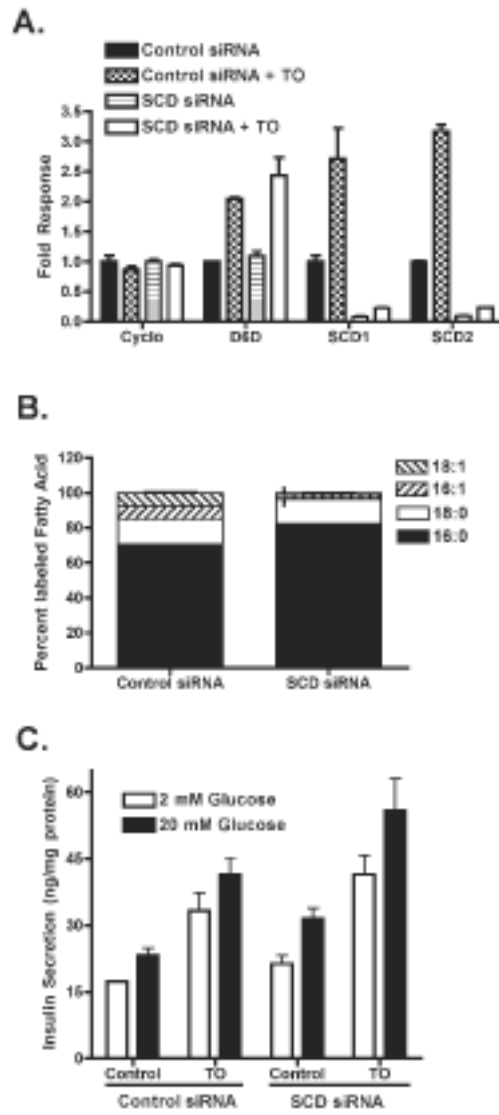

Supplement: en.2008-1039_4.pdf [file en.2008-1039_4.pdf]
